# Supplementary material for: hMENA isoforms impact NSCLC patient outcome through fibronectin/β1 integrin axis
Source: PubMed Central journal article supplement (PMC6193944; doi:10.1038/s41388-018-0364-3), 2018-06-15
Supplement: 41388_2018_364_MOESM2_ESM.pdf [file 41388_2018_364_MOESM2_ESM.pdf]

**a**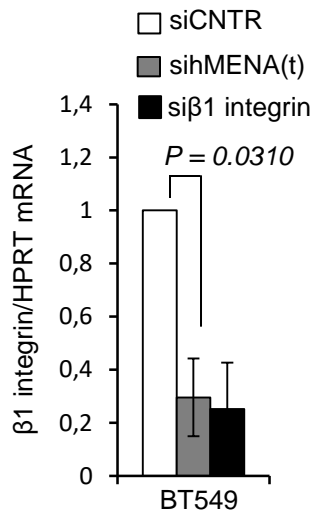**b**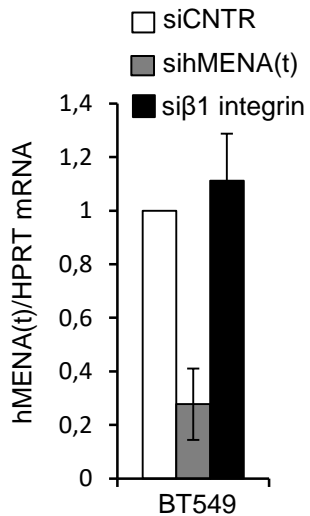**c**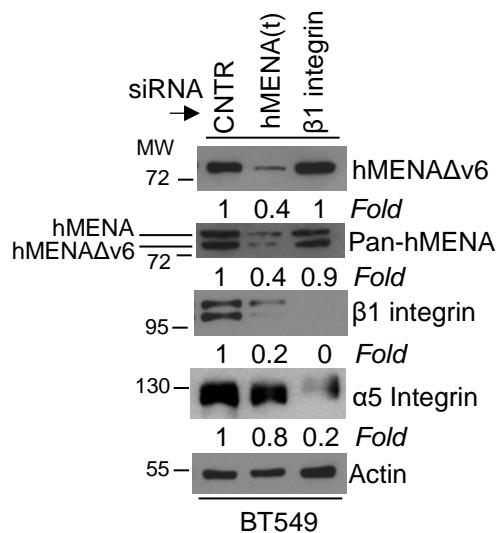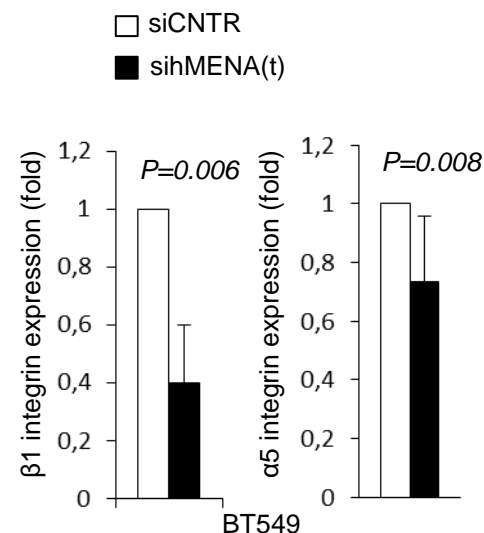**d**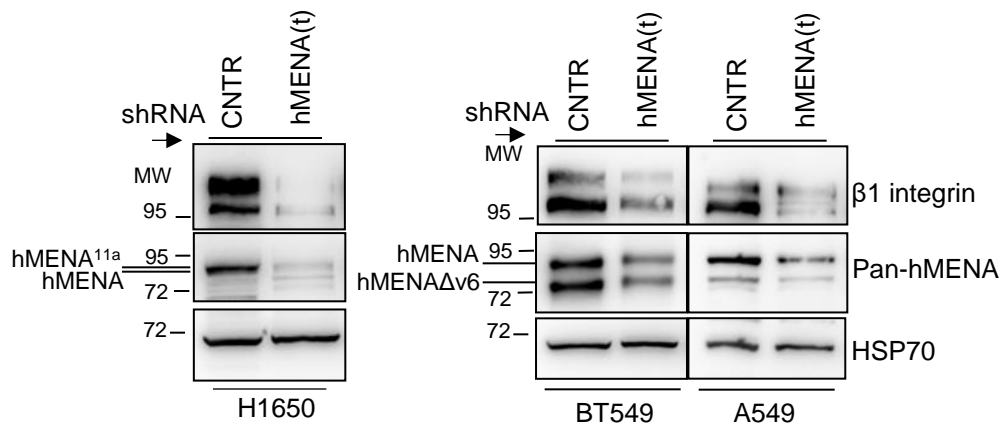**e**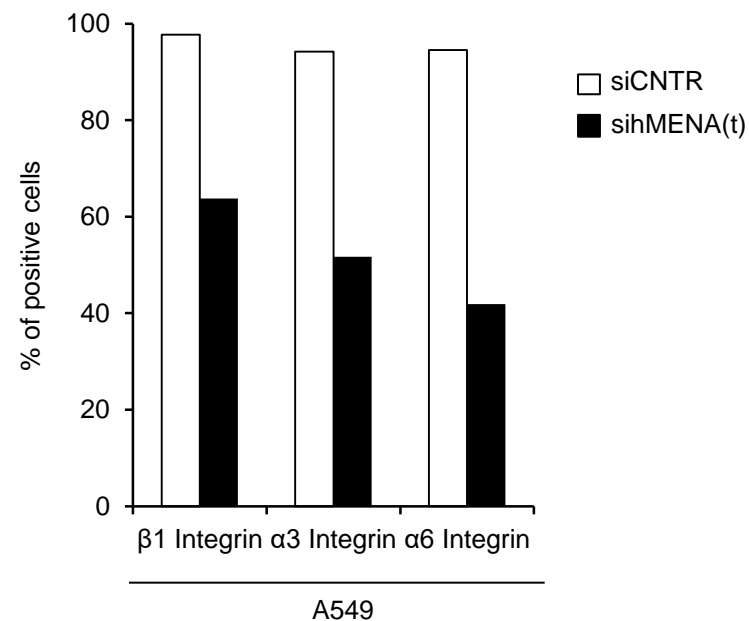

Supplementary Figure 1.

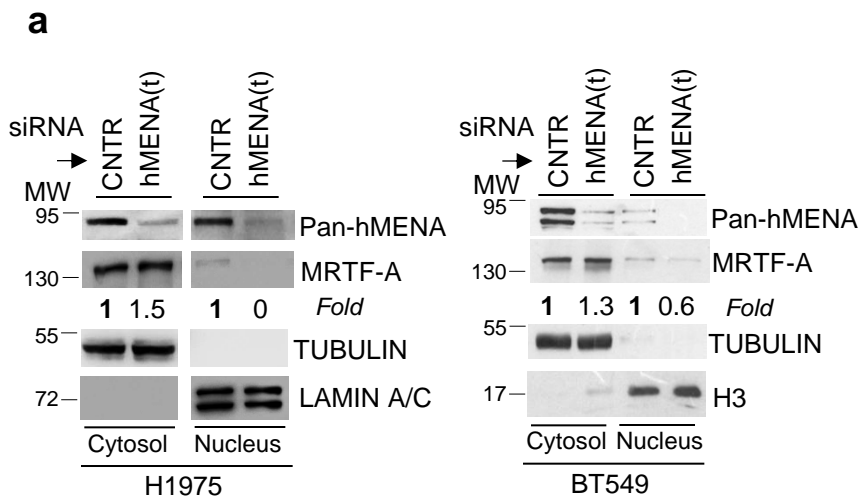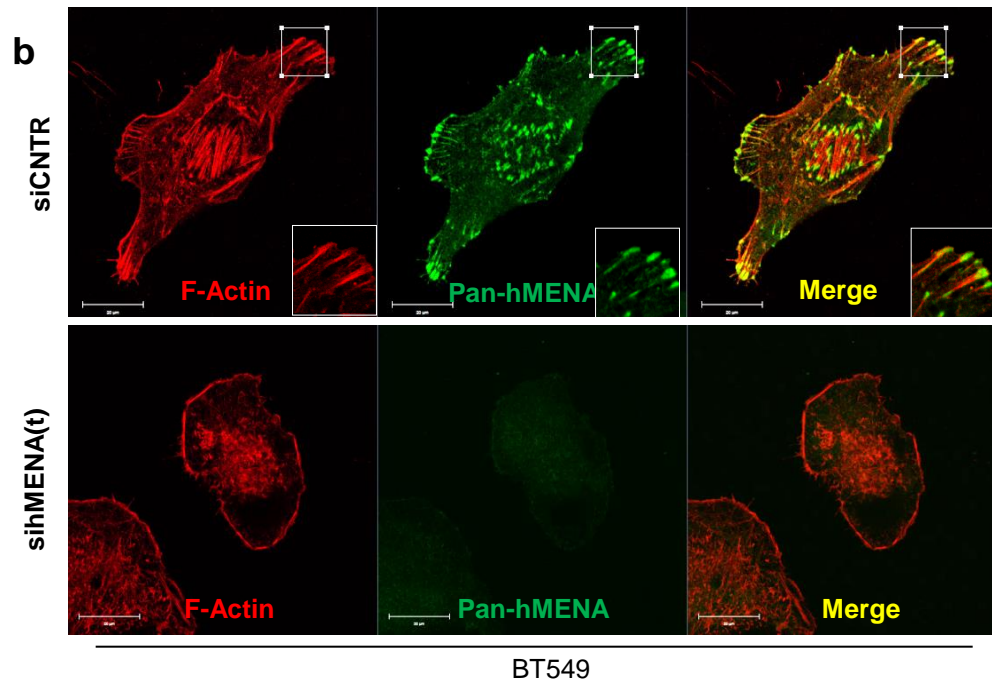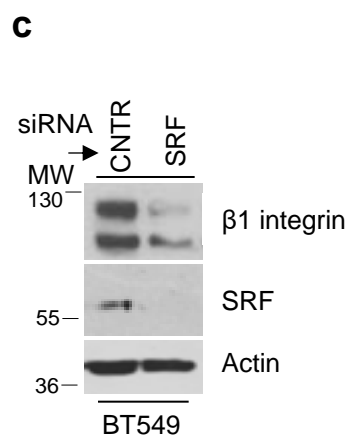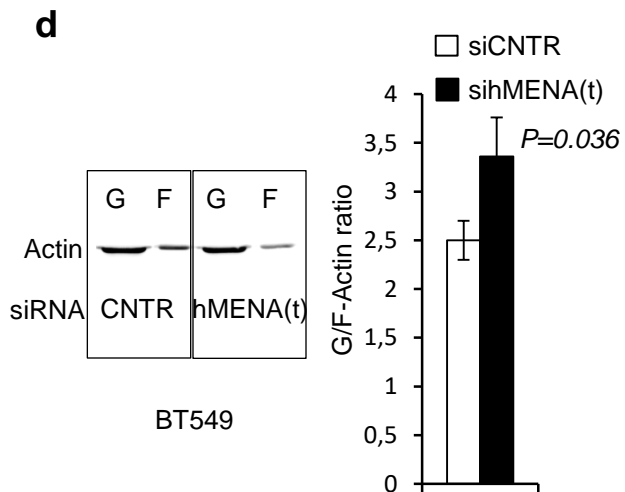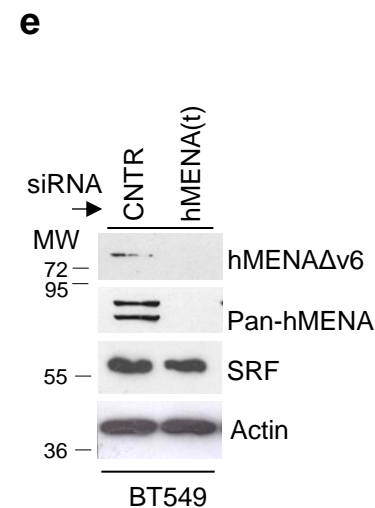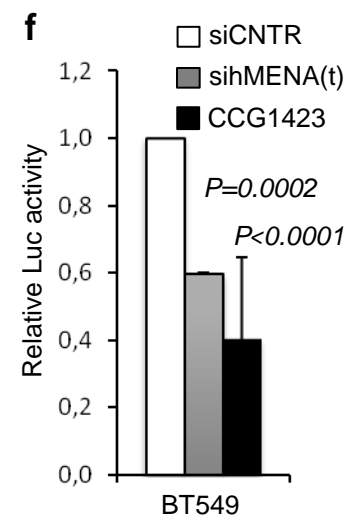

Supplementary Figure 2.

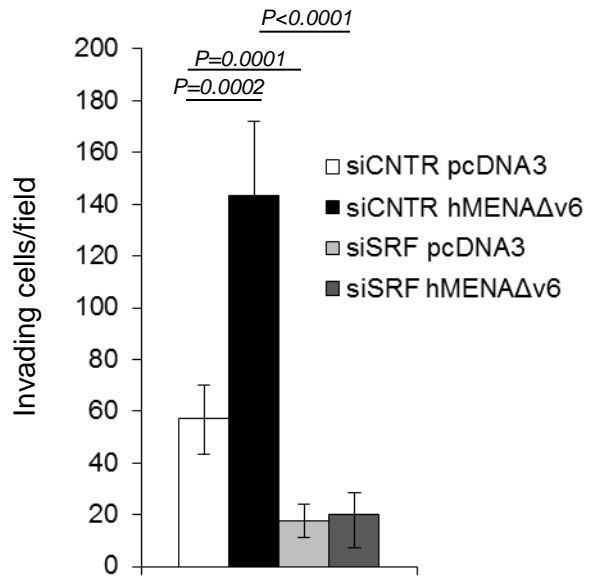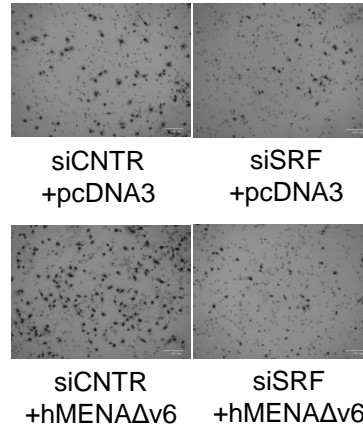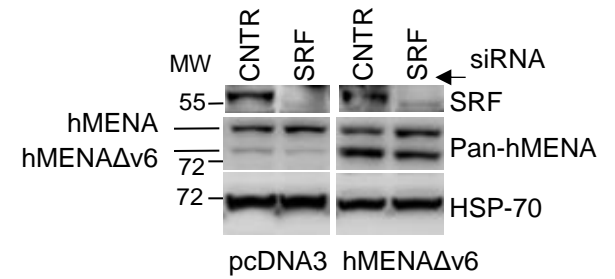

**A549 cells**

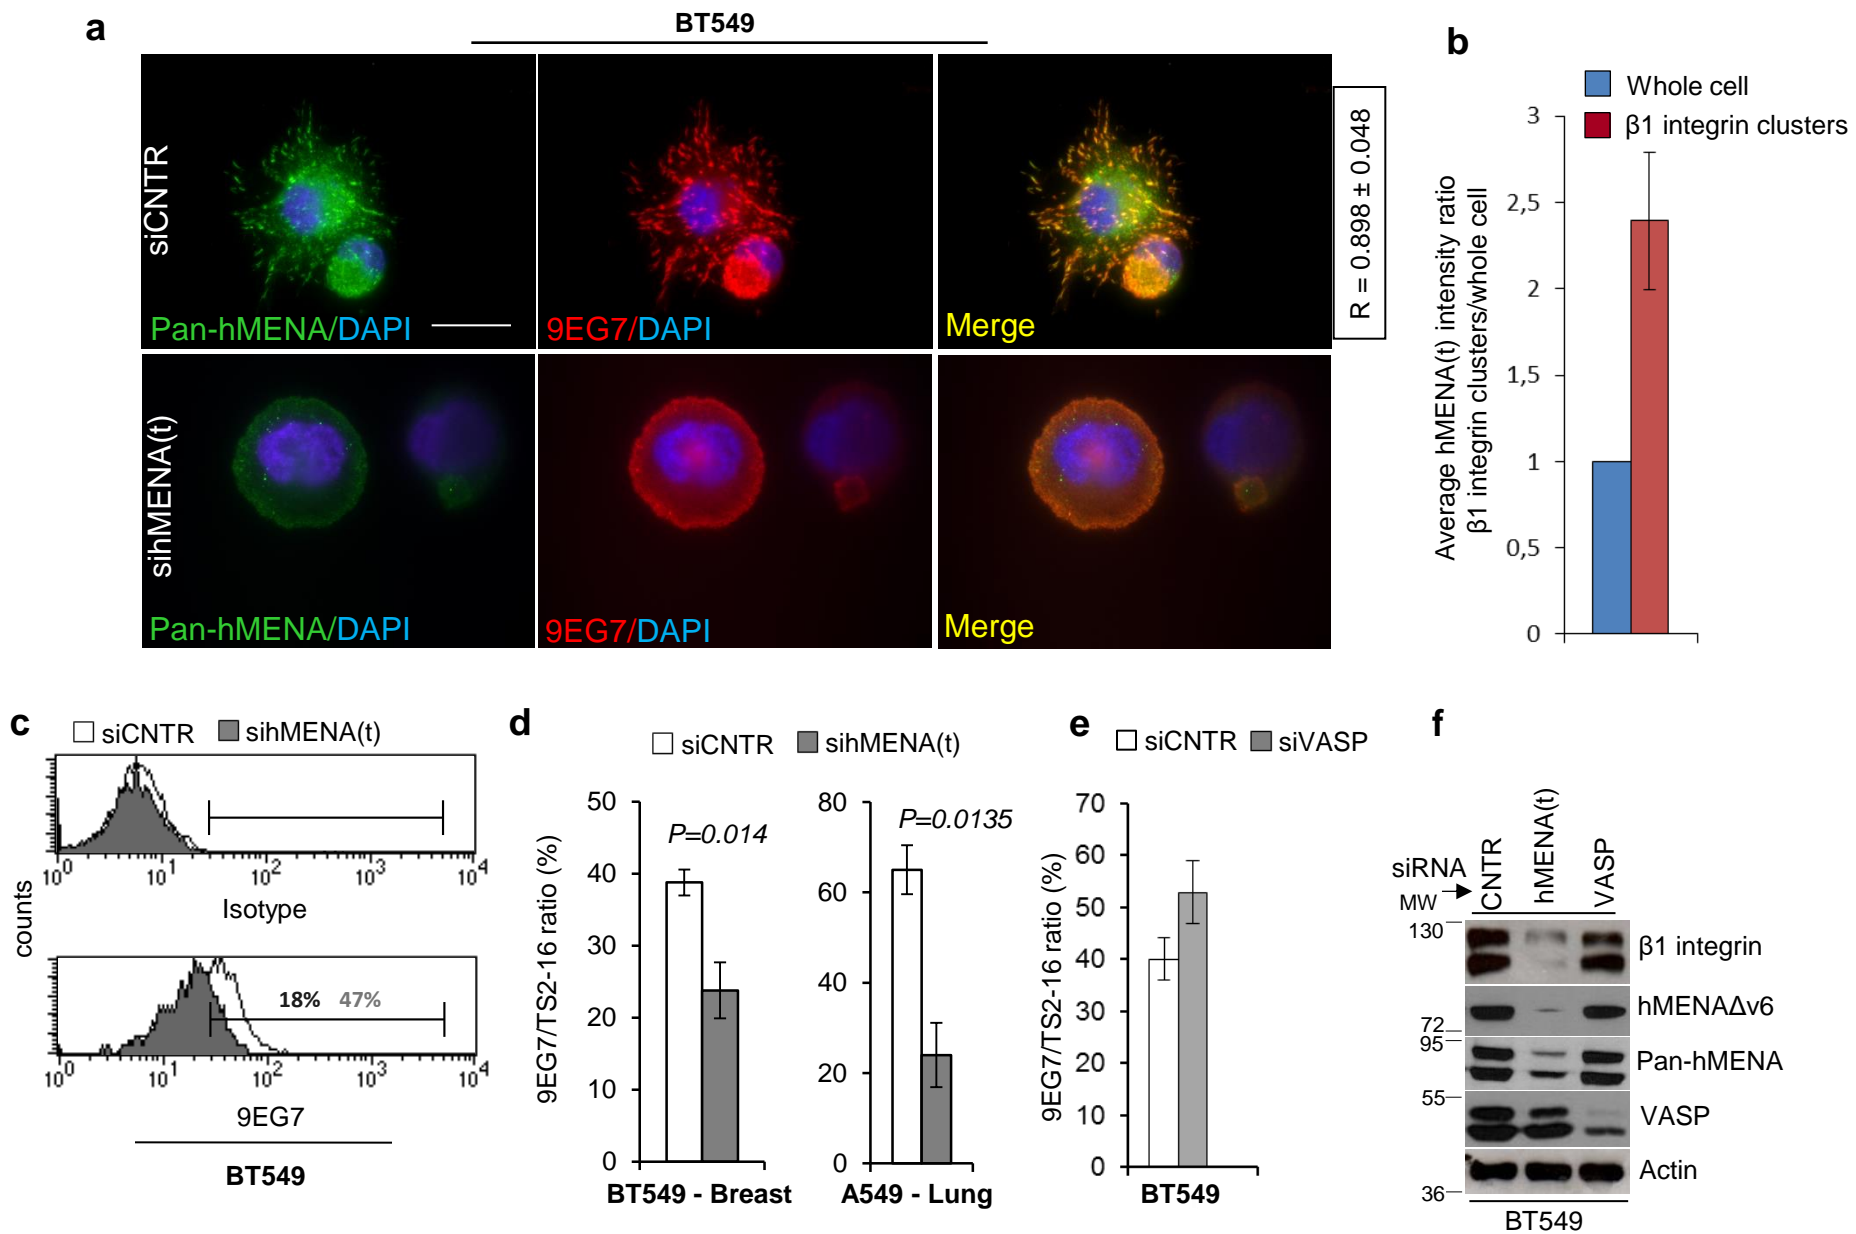

Supplementary Figure 4.

**a**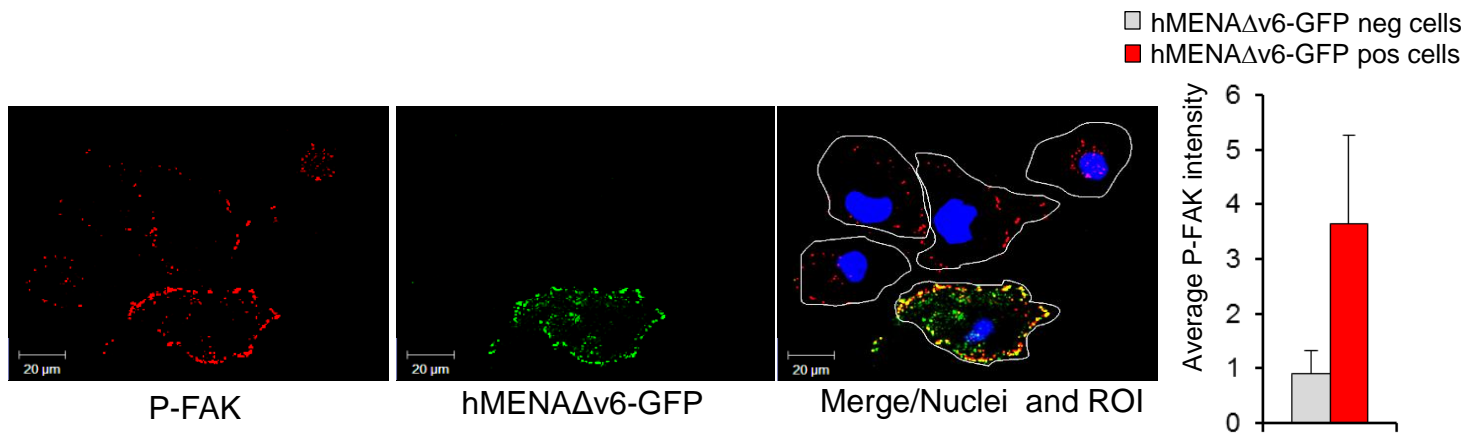**A549****c**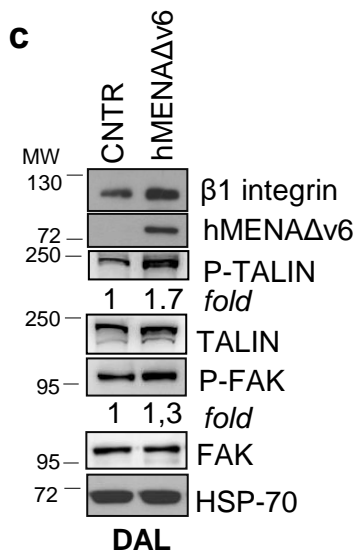**DAL****b**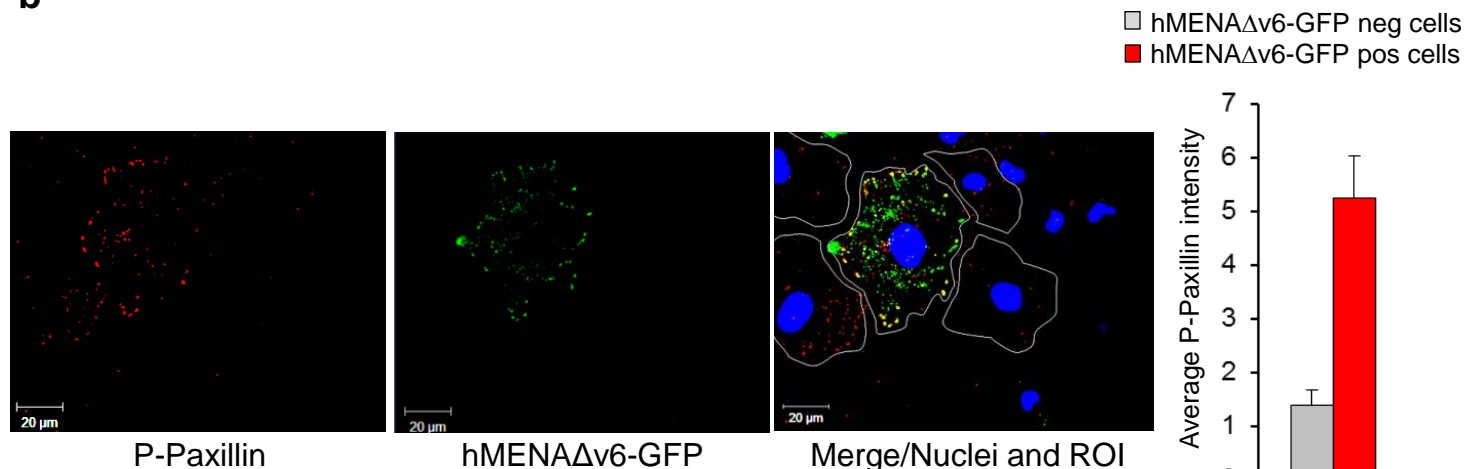**A549****d**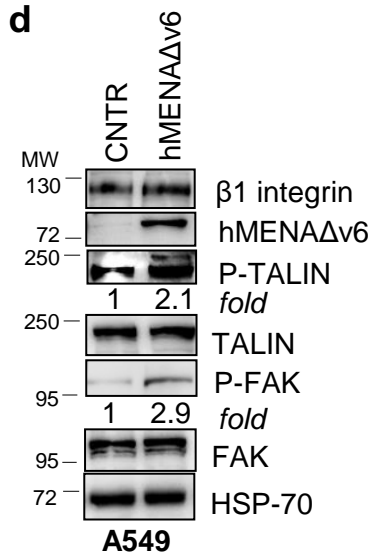**A549**

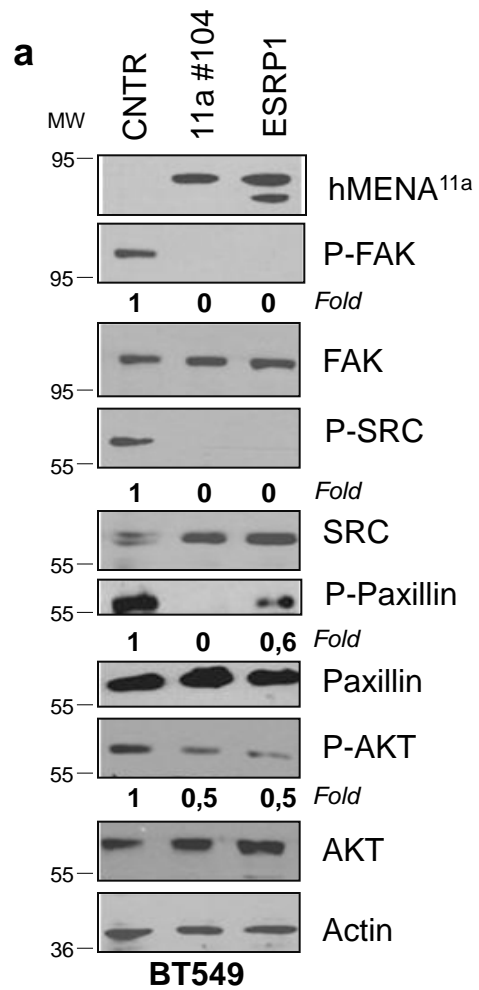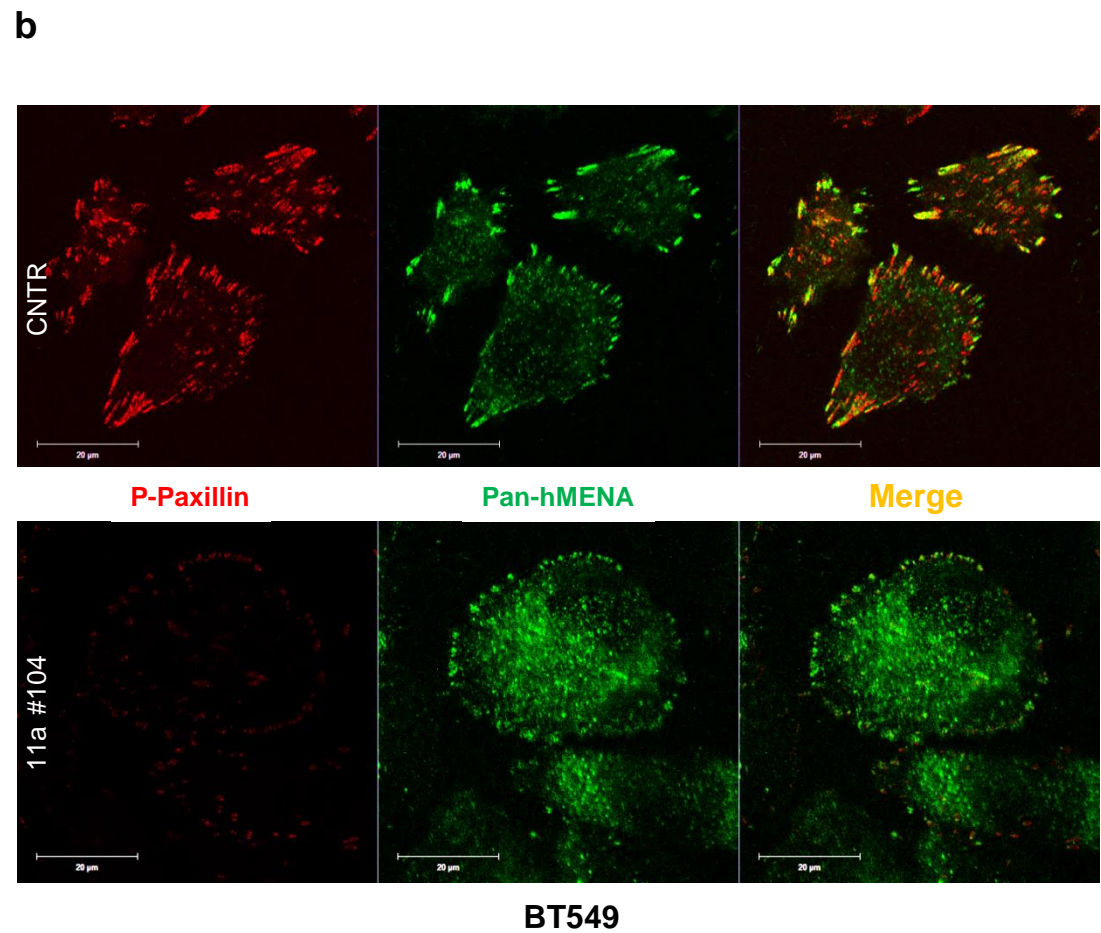

Supplementary Figure 6.

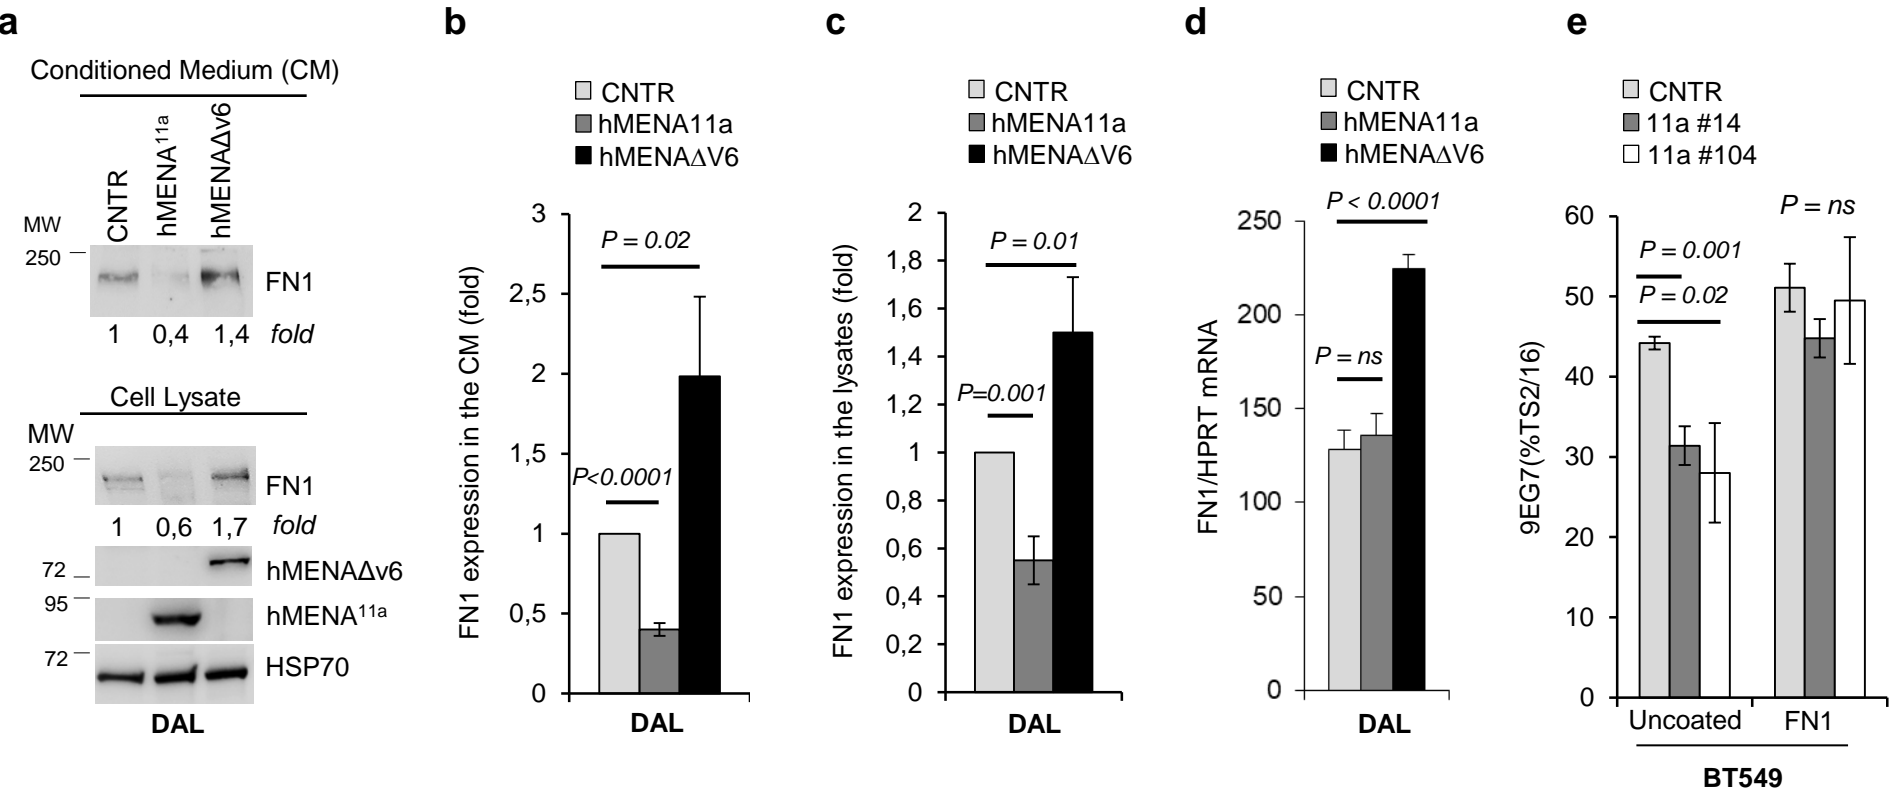

Supplementary Figure 7.
